# Supplementary material for: Recent advancements in alginate-based films for active food packaging applications
Source: Royal Society of Chemistry journal article supplement (doi:10.1039/d3fb00216k), 2024-01-01
Supplement: d3fb00216k1.pdf [file d3fb00216k1.pdf]

## Supplementary Materials

**Table:** Commercially Available Film

| <b>Polysaccharide film</b>        | <b>Source</b>                                                       | <b>Commercial Organization</b> | <b>Quality Parameter</b>                                                       | <b>Applications</b>                                          | <b>Ref.</b> |
|-----------------------------------|---------------------------------------------------------------------|--------------------------------|--------------------------------------------------------------------------------|--------------------------------------------------------------|-------------|
| Chitosan Film                     | Shrimp and Crab Shells                                              | BioPack (US)                   | Biodegradable<br>Antimicrobial<br>Transparent<br>Breathable                    | Fresh produce packaging<br>Meat packaging<br>Wound dressings | 1           |
| Whey Protein                      | Whey protein is a byproduct of cheese production.                   | Bluelab Whey, Foodstrong (US)  | Good gas barrier properties, film-forming tendency.                            | Food packaging, especially for perishable products.          | 2           |
| Carboxymethyl Cellulose           | Derived from cellulose, often from wood pulp.                       | Celsol, Nouryon                | Water solubility, film flexibility, and mechanical strength.                   | Edible packaging, encapsulation of bioactive compounds.      | 3           |
| Gum Arabic                        | Extracted from the Acacia tree.                                     | Iscgums, Agrigum               | Excellent emulsifying properties, stability in aqueous solutions.              | Encapsulation, flavor masking, and film-forming agent.       | 3           |
| Octenyl Succinic Anhydride Starch | Modified starch obtained from various sources (e.g., corn, potato). | Cleargum Cargill (US)          | Improved water resistance, film flexibility.                                   | Coating for fruits, vegetables, and bakery products.         | 3           |
| Water-Soluble Soy Polysaccharides | Derived from soybeans.                                              | ALFA Chemistry                 | Good film-forming ability, biodegradability.                                   | Edible coatings for fruits, vegetables, and meats.           | 3           |
| Xylan Film                        | Hemicellulose from various plants                                   | XYLAB (France)                 | Biodegradable<br>Good oxygen barrier<br>Can be blended for specific properties | Food packaging<br>Mulch films<br>Agricultural applications   | 4           |
| Curdlan Film                      | Alcaligenes faecalis                                                | Nagase ChemTex                 | Water-insoluble<br>Heat-resistant                                              | Heat-resistant food                                          | 5           |

|                    |                                          |                  |                                                                                               |                                                                                          |   |
|--------------------|------------------------------------------|------------------|-----------------------------------------------------------------------------------------------|------------------------------------------------------------------------------------------|---|
|                    | bacteria                                 | (Japan)          | Good oil barrier                                                                              | packaging<br>Oil and fat<br>containers<br>Industrial<br>applications                     |   |
| Gellan Gum<br>Film | Sphingomonas<br>paucimobilis<br>bacteria | Kelcogel<br>(US) | Thermoreversible<br>gelling<br>properties<br>Film-forming<br>ability<br>Adjustable<br>texture | Controlled-<br>release<br>capsules<br>Food<br>texturizing<br>agent<br>Edible<br>coatings | 6 |

### References:

- 1 C. De Carli, V. Aylanc, K. M. Mouffok, A. Santamaria-Echart, F. Barreiro, A. Tomás, C. Pereira, P. Rodrigues, M. Vilas-Boas and S. I. Falcão, *Int J Biol Macromol*, 2022, **213**, 486–497.
- 2 L. Kumar, D. Ramakanth, K. Akhila and K. K. Gaikwad, *Environ Chem Lett*, 2022, **20**, 875–900.
- 3 K. Łupina, D. Kowalczyk and W. Kazimierczak, *Polymers (Basel)*, 2022, **14**, 4001.
- 4 J. Madine, E. Jack, P. G. Stockley, S. E. Radford, L. C. Serpell and D. A. Middleton, *J Am Chem Soc*, 2008, **130**, 14990–15001.
- 5 N. Aquinas, R. Bhat M and S. Selvaraj, *Polymer Bulletin*, 2022, **79**, 6905–6927.
- 6 C. de Lima Barizão, M. I. Crepaldi, O. de O. S. Junior, A. C. de Oliveira, A. F. Martins, P. S. Garcia and E. G. Bonafé, *Int J Biol Macromol*, 2020, **165**, 582–590.
